# Supplementary material for: NQO1 C609T polymorphism and lung cancer susceptibility: Evidence from a comprehensive meta-analysis
Source: PubMed Central journal article supplement (PMC5731955; doi:10.18632/oncotarget.21084), 2017-09-19
Supplement: oncotarget-08-102301-s001.pdf [file oncotarget-08-102301-s001.pdf]

## ***NQO1* C609T polymorphism and lung cancer susceptibility: Evidence from a comprehensive meta-analysis**

### **SUPPLEMENTARY MATERIALS**

**Supplementary Table 1: Score of quality assessment**

| <b>Criteria</b>                                   | <b>Score</b> |
|---------------------------------------------------|--------------|
| Representativeness of case                        |              |
| Selected from population cancer registry          | 2            |
| Selected from hospital                            | 1            |
| No method of selection described                  | 0            |
| Representativeness of control                     |              |
| Population-based                                  | 3            |
| Blood donors                                      | 2            |
| Hospital-based                                    | 1            |
| Not described                                     | 0            |
| Ascertainment of cancer cases                     |              |
| Histopathologic confirmation                      | 2            |
| Patient medical record                            | 1            |
| Not described                                     | 0            |
| Control selection                                 |              |
| Controls matched with cases by age and sex        | 2            |
| Controls matched with cases only by age or by sex | 1            |
| Not matched or not described                      | 0            |
| Genotyping examination                            |              |
| Genotyping done blindly and quality control       | 2            |
| Only genotyping done blindly or quality control   | 1            |
| Unblinded and without quality control             | 0            |
| HWE                                               |              |
| HWE in the control group                          | 1            |
| HWE in the control group or not mentioned         | 0            |
| Total sample size                                 |              |
| > 1000                                            | 3            |
| 501 - 1000                                        | 2            |
| 201 - 500                                         | 1            |
| ≤ 200                                             | 0            |
